# Supplementary material
Source: PubMed Central journal article supplement (PMC5161665)
Supplement: NIHMS807671-supplement-1.pdf [file NIHMS807671-supplement-1.pdf]

# Supplementary Figure 1

**a** Western blots of three sets of cell lysates from GNF6702-treated *T. cruzi* epimastigotes

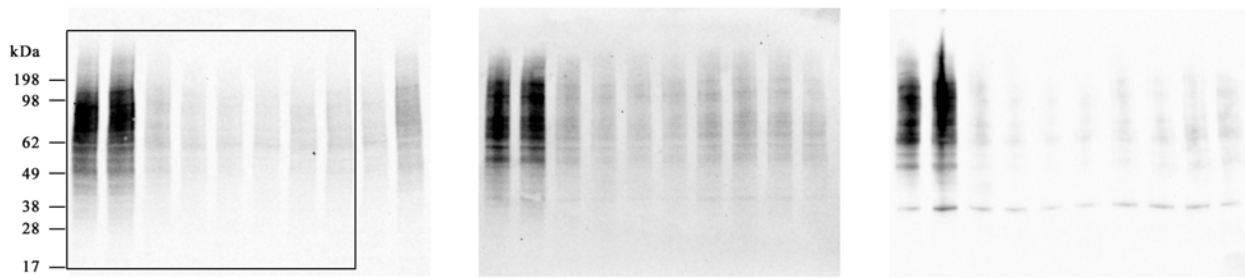

Extended Data Fig. 7a, upper panel

**b** Western blots of three sets of cell lysates from bortezomib-treated *T. cruzi* epimastigotes

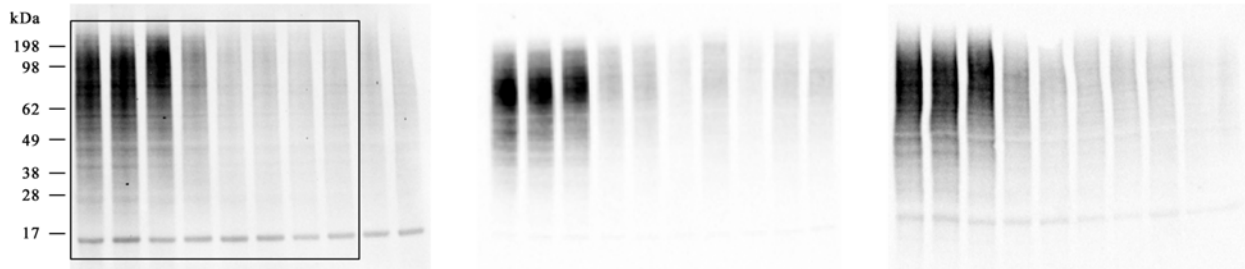

Extended Data Fig. 7a, lower panel

**c** Western blots of three sets of cell lysates from GNF6702-treated 3T3 cells

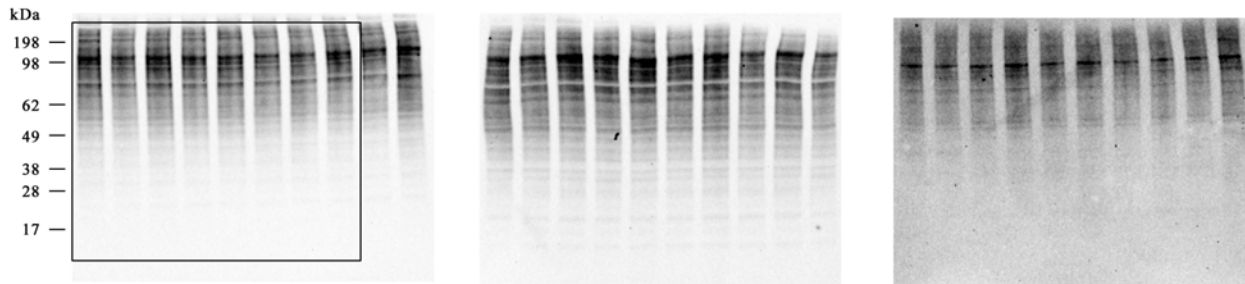

Extended Data Fig. 7b, upper panel

**d** Western blots of three sets of cell lysates from bortezomib-treated 3T3 cells

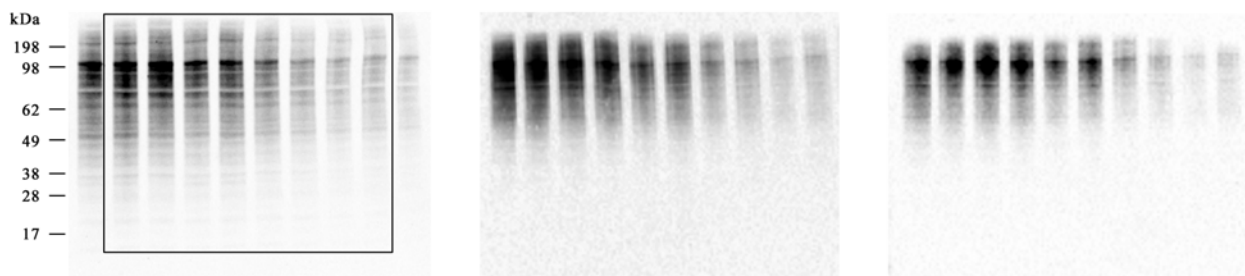

Extended Data Fig. 7b, lower panel
